# Supplementary material
Source: publisher figshare collection journal article supplement (https://acs.figshare.com/ndownloader/files/22767647)
Supplement: Supplementary file 1 [file 22767647]

**Supporting Information**  
**Deep Eutectic Solvents Mixed with Fluorinated Refrigerants for Absorption Refrigeration:**  
**A Molecular Simulation Study**

Rubaiyet Abedin,<sup>1</sup> Yan Shen,<sup>1</sup> John C. Flake<sup>2</sup> and Francisco R. Hung<sup>1,\*</sup>

<sup>1</sup> Department of Chemical Engineering, Northeastern University, Boston, MA 02115

<sup>2</sup> Cain Department of Chemical Engineering, Louisiana State University, Baton Rouge, LA 70803

**Table S1.** Non-bonded parameters for levulinic acid

| Atom name | GAFF atom type | Partial charge (e) | vdW radius (Å) | Well depth (kcal/mol) |
|-----------|----------------|--------------------|----------------|-----------------------|
| CF        | c              | 0.7715             | 1.9080         | 0.0860                |
| CG        | c3             | -0.1103            | 1.9080         | 0.1094                |
| CH        | c3             | -0.0358            | 1.9080         | 0.1094                |
| CI        | c              | 0.6301             | 1.9080         | 0.0860                |
| CJ        | c3             | -0.4086            | 1.9080         | 0.1094                |
| OF        | o              | -0.5962            | 1.6612         | 0.2100                |
| OHF       | oh             | -0.6871            | 1.7210         | 0.2104                |
| OI        | o              | -0.5632            | 1.6612         | 0.2100                |
| HOF       | ho             | 0.4583             | 0.1120         | 0.0010                |
| HG1       | hc             | 0.0652             | 1.4870         | 0.0157                |
| HG2       | hc             | 0.0652             | 1.4870         | 0.0157                |
| HH1       | hc             | 0.0277             | 1.4870         | 0.0157                |
| HH2       | hc             | 0.0277             | 1.4870         | 0.0157                |
| HJ1       | hc             | 0.1185             | 1.4870         | 0.0157                |
| HJ2       | hc             | 0.1185             | 1.4870         | 0.0157                |
| HJ3       | hc             | 0.1185             | 1.4870         | 0.0157                |

All bonded parameters are taken from the GAFF force field

---

\* Corresponding author. E-mail: f.hung@northeastern.edu

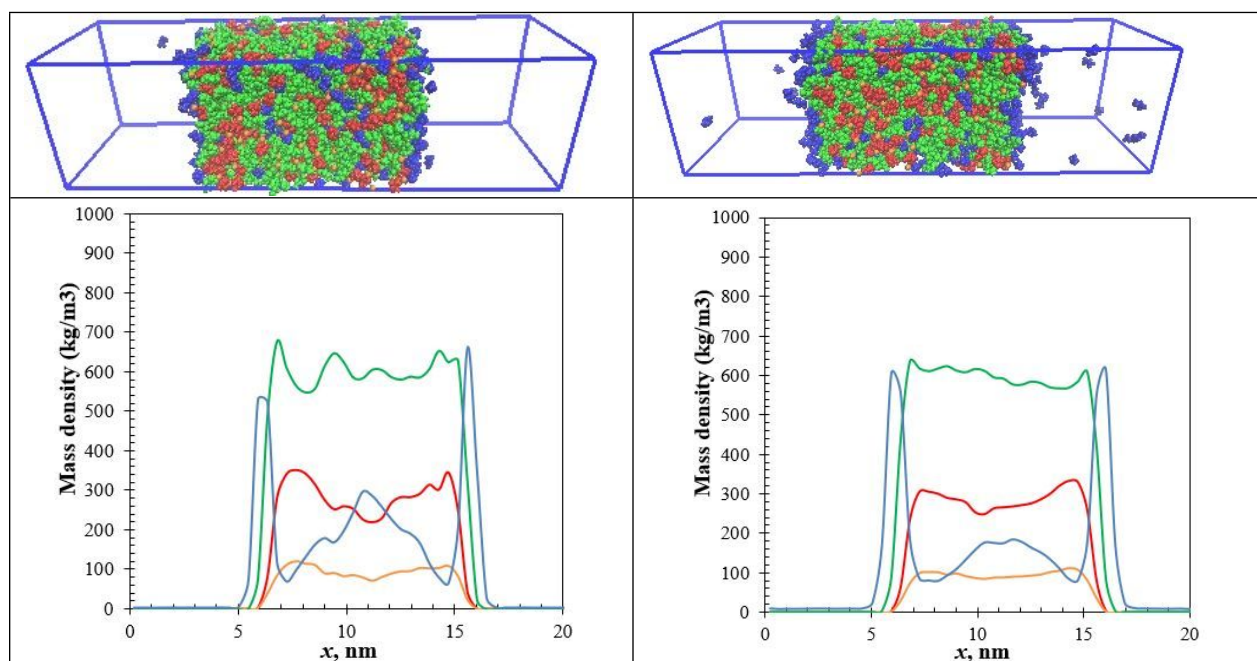

**Figure S1.** Representative simulation snapshots (top) and local density profiles (bottom) of systems of R245fa in levuline, from  $NVT$  simulations in elongated boxes with  $T = 298$  K (left) and  $T = 343$  K (right). Red = choline (cation), orange = chlorine (anion), green = levulinic acid (HBD), and blue = R245fa (refrigerant).

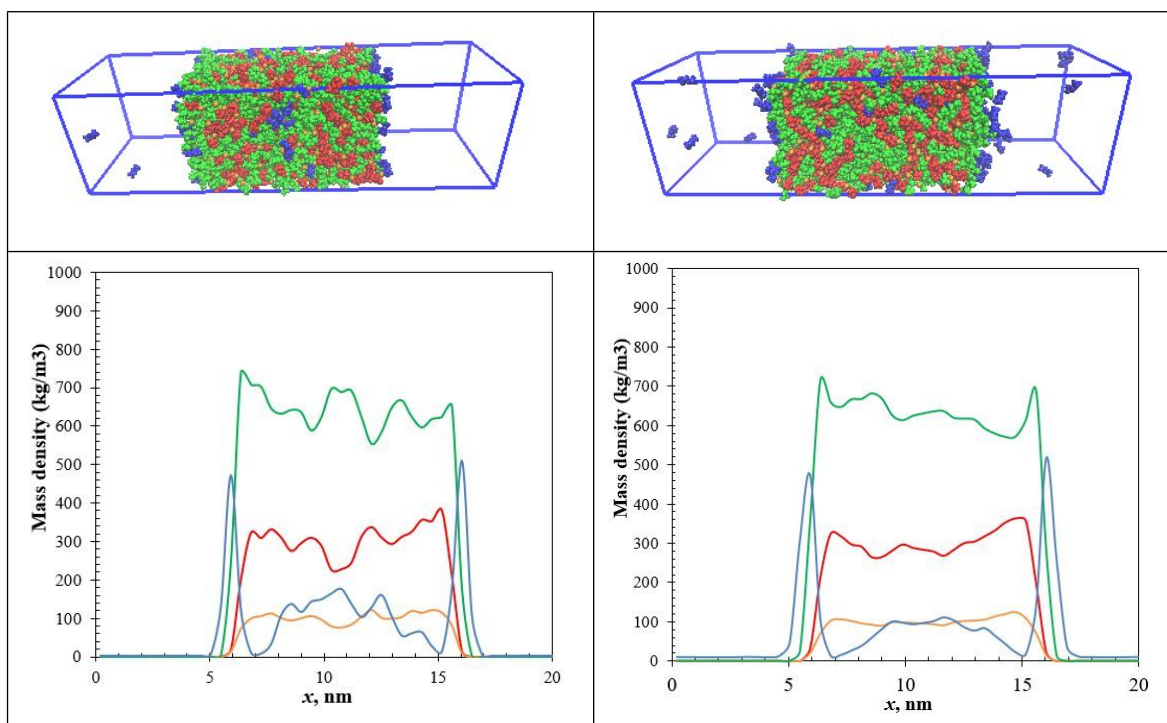

**Figure S2.** Representative simulation snapshots (top) and local density profiles (bottom) of systems of HFO1336mzzE in levuline, from NVT simulations in elongated boxes with  $T = 298$  K (left) and  $T = 343$  K (right). Red = choline (cation), orange = chlorine (anion), green = levulinic acid (HBD), and blue = HFO1336mzzE (refrigerant).

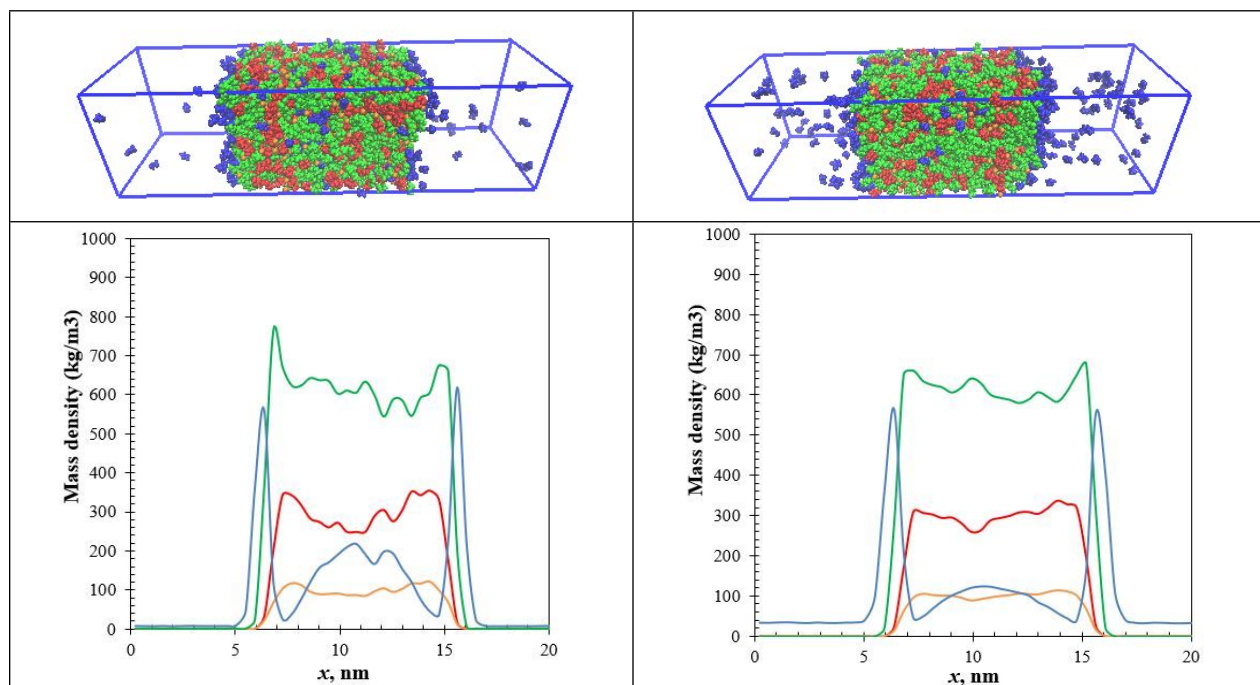

**Figure S3.** Representative simulation snapshots (top) and local density profiles (bottom) of systems of R1234zeE in levuline, from  $NVT$  simulations in elongated boxes with  $T = 298$  K (left) and  $T = 343$  K (right). Red = choline (cation), orange = chlorine (anion), green = levulinic acid (HBD), and blue = R1234zeE (refrigerant).

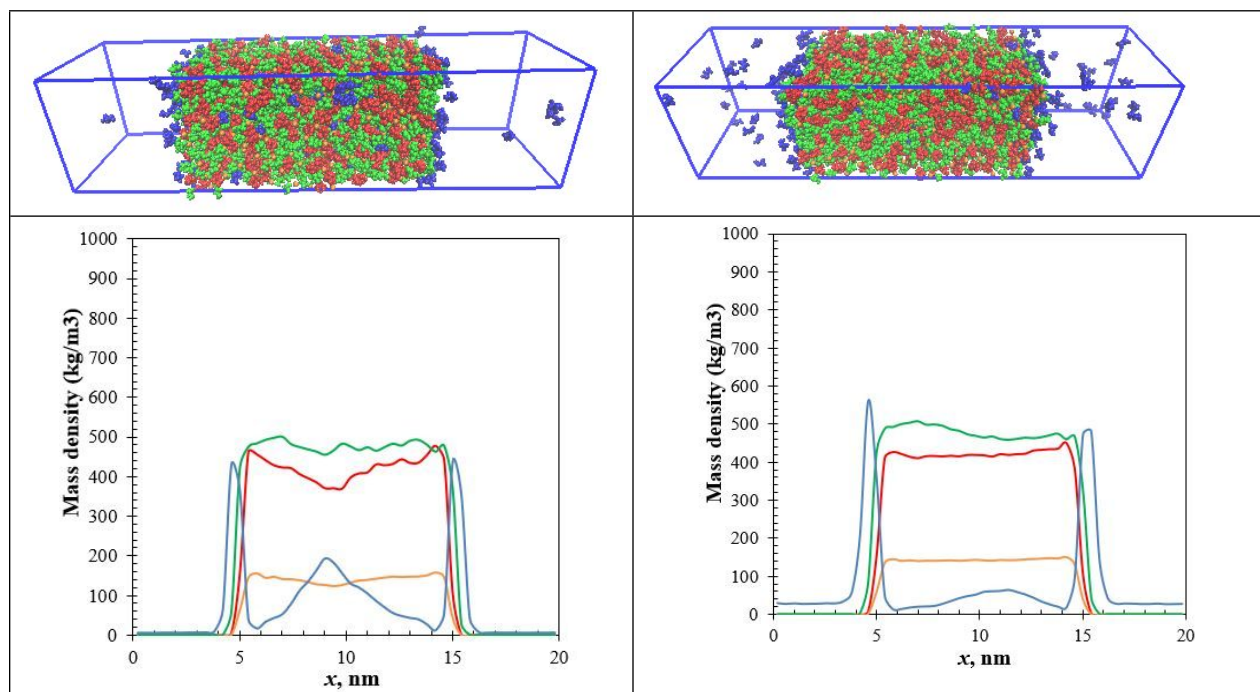

**Figure S4.** Representative simulation snapshots (top) and local density profiles (bottom) of systems of R1234zeE in ethaline, from  $NVT$  simulations in elongated boxes with  $T = 298$  K (left) and  $T = 343$  K (right). Red = choline (cation), orange = chlorine (anion), green = ethylene glycol (HBD), and blue = R1234zeE (refrigerant).

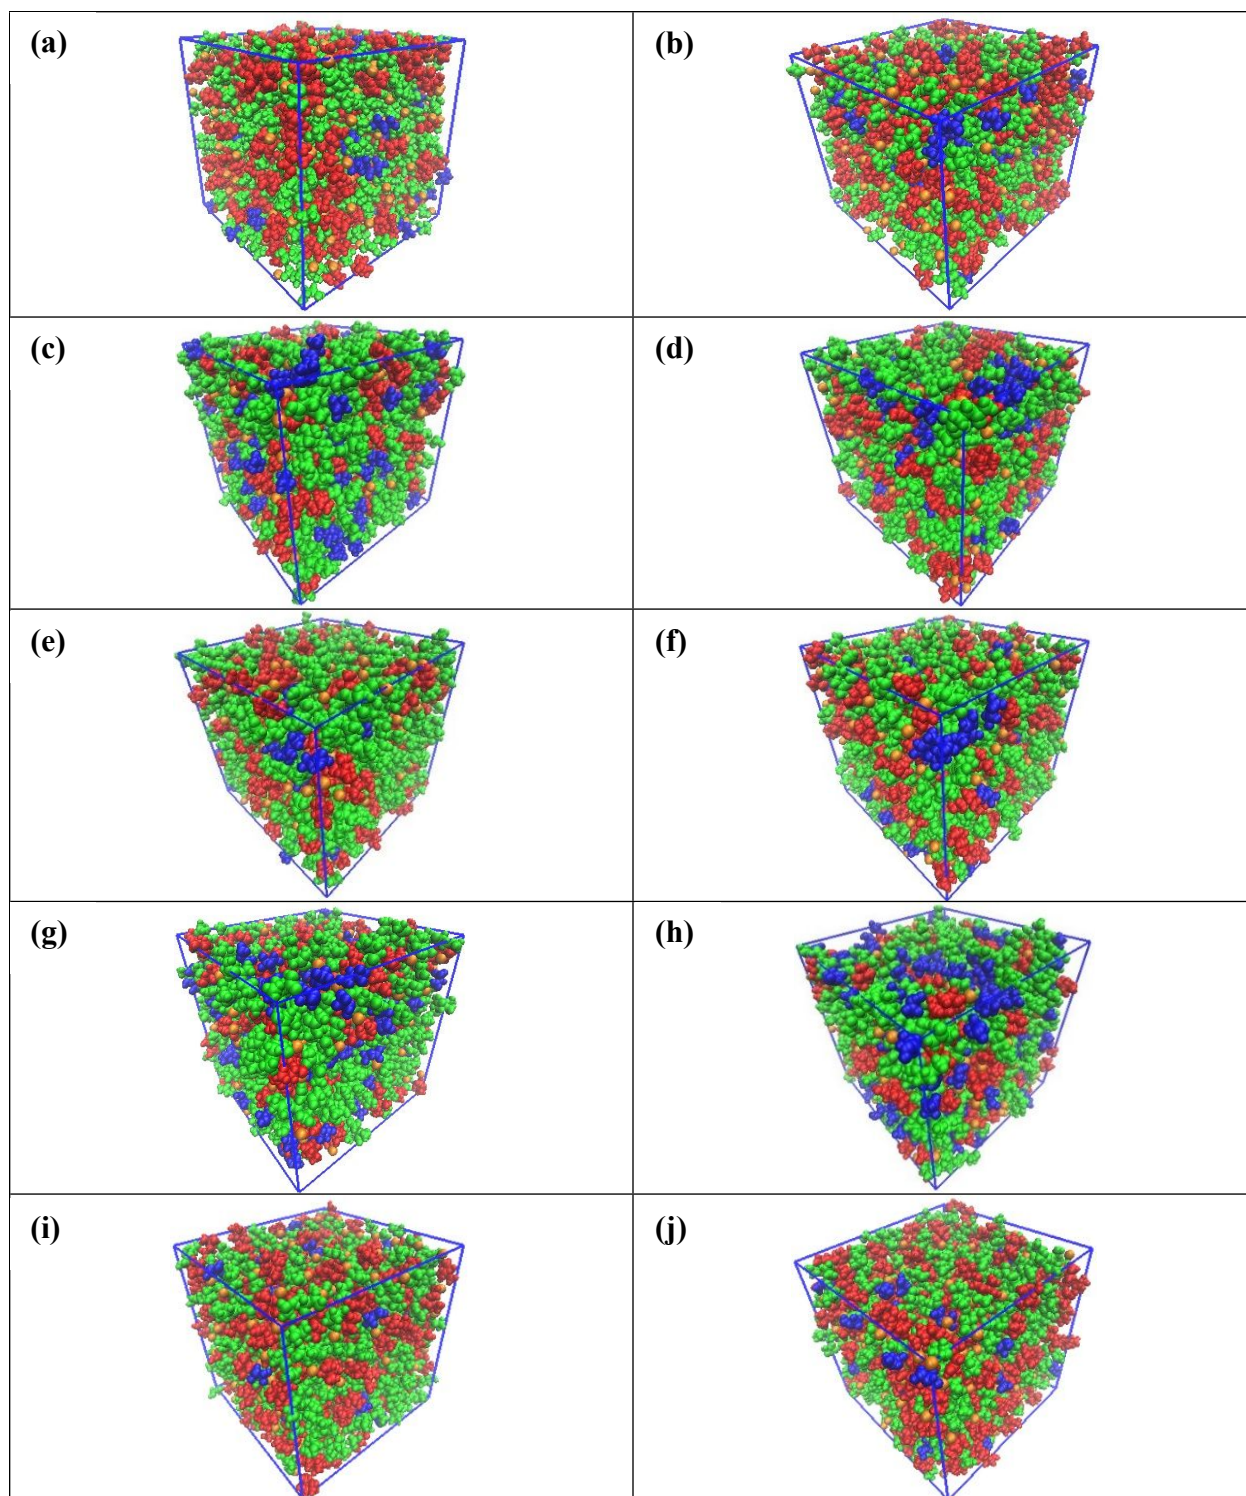

**Figure S5.** Representative simulation snapshots of refrigerant-DES mixtures at  $T_5 = 298$  K (left column) and  $T_8 = 343$  K (right column). (a,b) R245fa-ethaline,  $x_R = 5\%$ ,  $P_5 = 1.0$  bar,  $P_8 = 2.5$  bar; (c,d) R245fa-levuline,  $x_R = 15\%$ ,  $P_5 = 1.0$  bar,  $P_8 = 2.5$  bar; (e,f) HFO1336mzzE-levuline,  $x_R = 5\%$ ,  $P_5 = 1.4$  bar,  $P_8 = 3.2$  bar; (g,h) R1234zeE-levuline,  $x_R = 20\%$ ,  $P_5 = 3.7$  bar,  $P_8 = 7.7$  bar; (i,j) R1234zeE-ethaline,  $x_R = 5\%$ ,  $P_5 = 3.7$  bar,  $P_8 = 7.7$  bar. Red = choline (cation), orange = chlorine (anion), green = HBD, and blue = refrigerant.

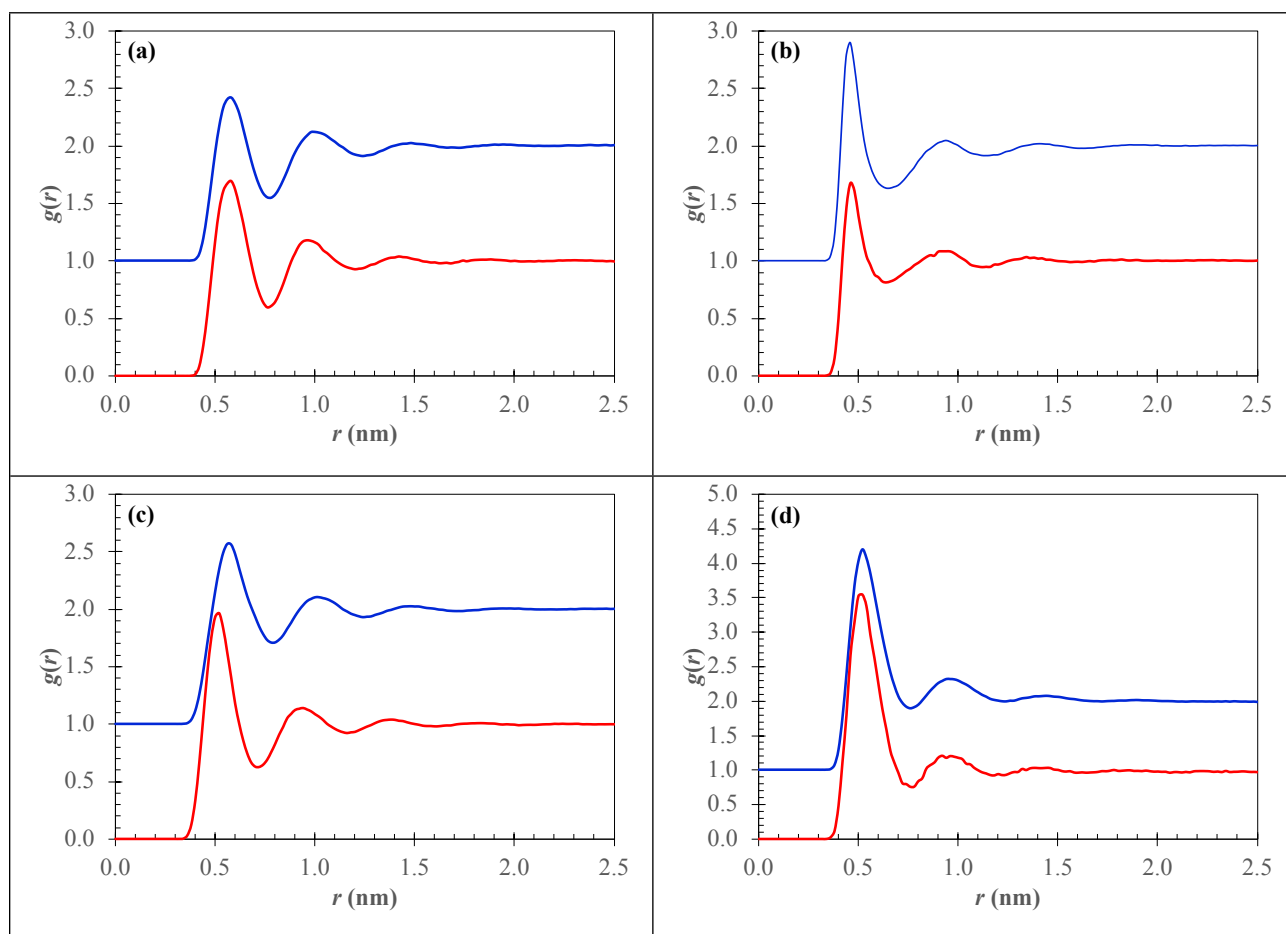

**Figure S6.** Center-of-mass radial distribution functions  $g(r)$  at  $T_5 = 298$  K for (a) cation-refrigerant, (b) anion-refrigerant, (c) HBD-refrigerant, and (d) refrigerant-refrigerant pairs. Blue = R1234zeE-levuline,  $P_5 = 3.7$  bar,  $x_R = 20\%$ ; red = R1234zeE-ethaline,  $P_5 = 3.7$  bar,  $x_R = 5\%$ .

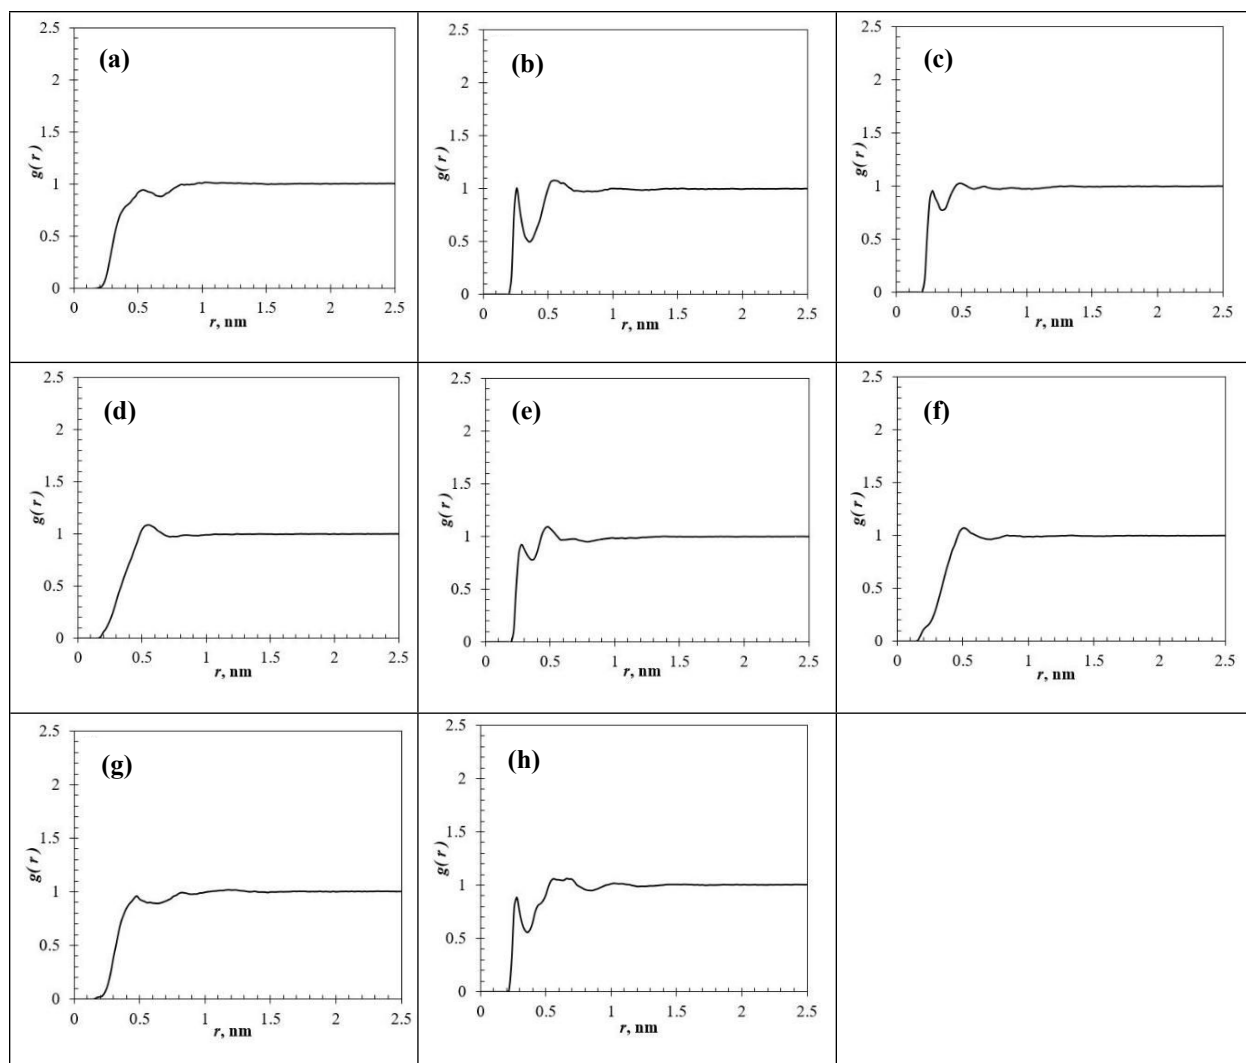

**Figure S7.** Atom-atom radial distribution functions  $g(r)$  in systems containing R245fa (5% molar) and ethaline at 298 K and 1 bar, for the following pairs: (a) FAA (R245fa) – HO1 (cation), (b) HAH (R245fa) – OAA (HBD), (c) FAC (R245fa) – HAC (HBD), (d) FAA (R245fa) – HAA (HBD), (e) FAA (R245fa) – HAC (HBD), (f) FAC (R245fa) – HAA (HBD), (g) FAC (R245fa) – HO1 (cation), (h) HAF (R245fa) – OAA (HBD).

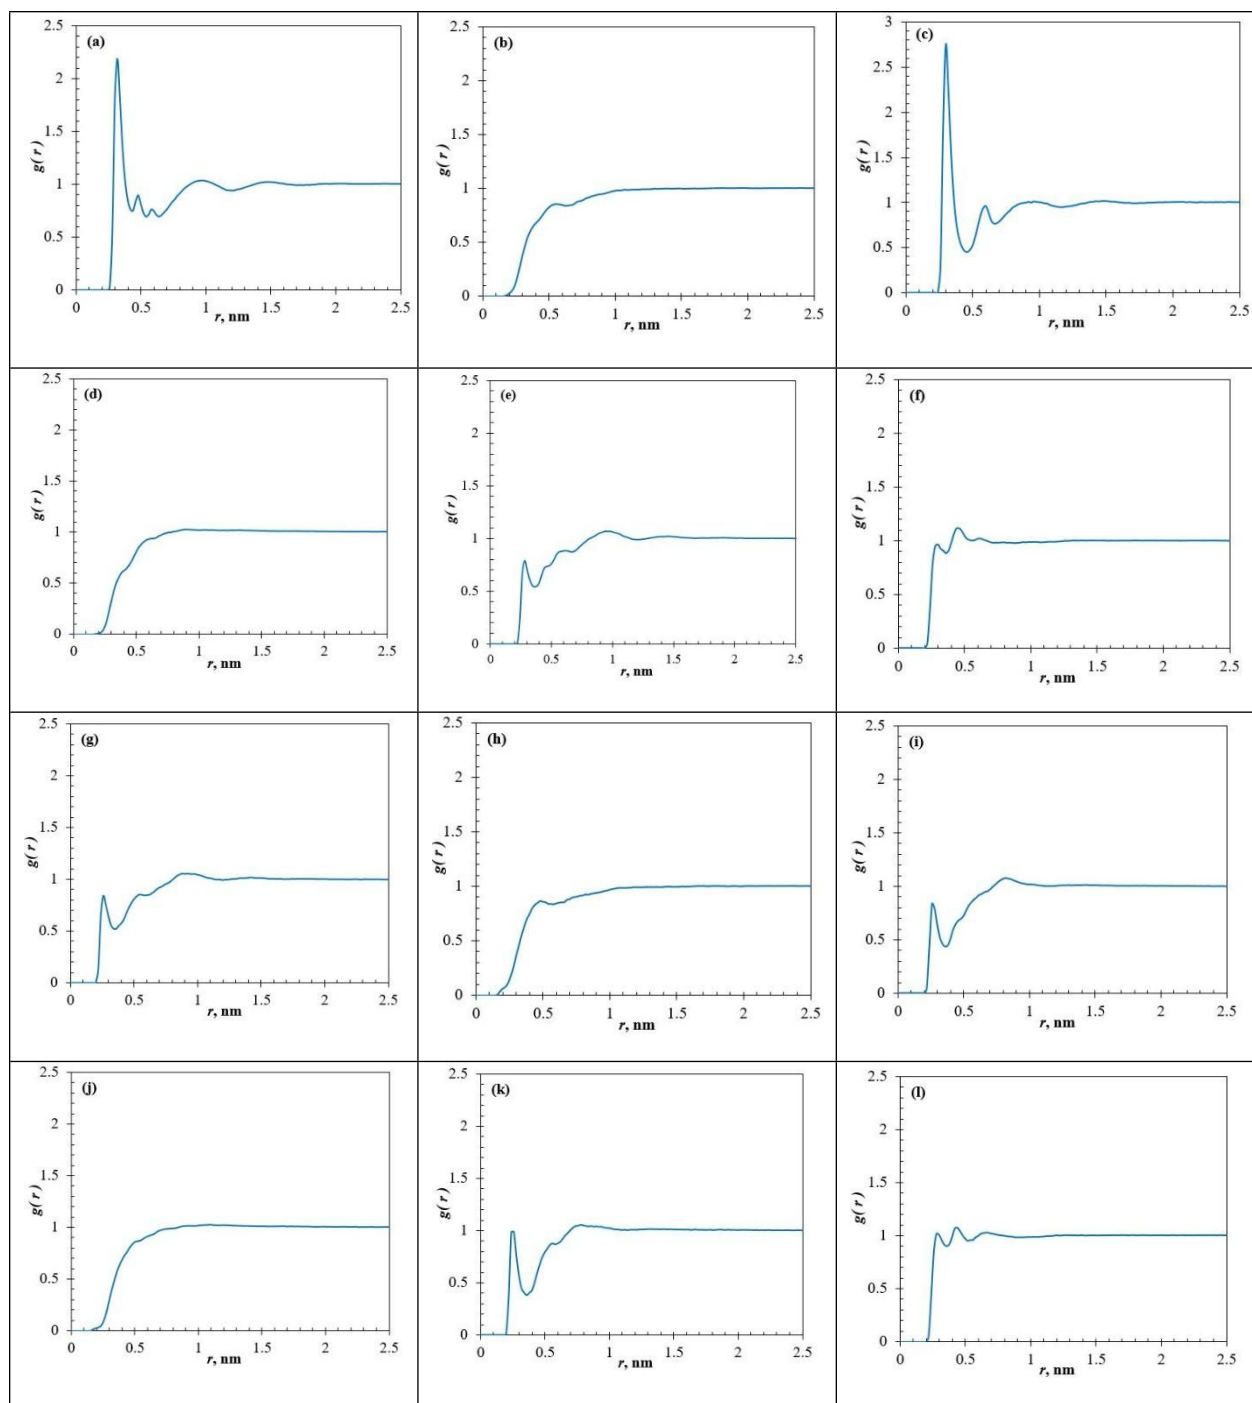

**Figure S8.** Atom-atom radial distribution functions  $g(r)$  in systems containing R245fa (15%) and levuline at 298 K and 1 bar, for the following pairs: (a) HAF (R245fa) – Cl (anion), (b) FAA (R245fa) – HO1 (cation), (c) HAH (R245fa) – Cl (anion), (d) FAA (R245fa) – HOF (HBD), (e) HAF (R245fa) – OHF (HBD), (f) FAA (R245fa) – HJ1 (HBD), (g) HAH (R245fa) – OHF (HBD), (h) FAC (R245fa) – HO1 (cation), (i) HAF (R245fa) – OF (HBD), (j) FAC (R245fa) – HOF (HBD), (k) HAH (R245fa) – OF (HBD), (l) FAC (R245fa) – HJ1 (HBD).

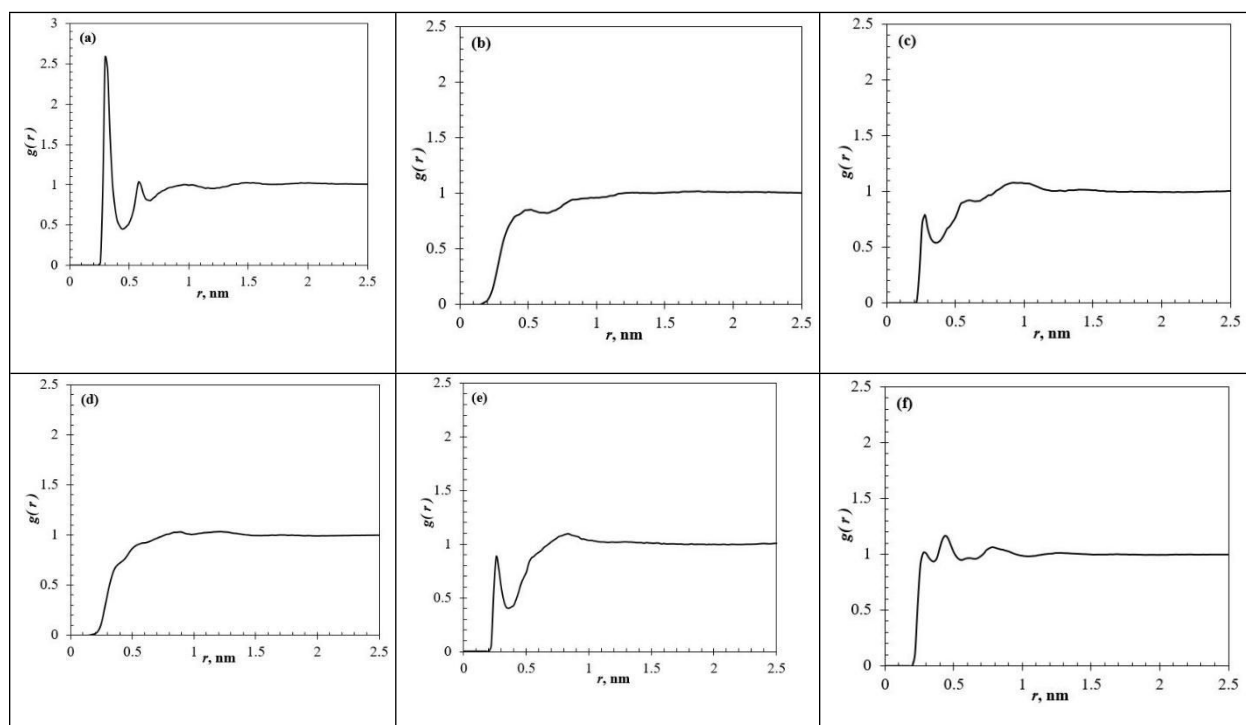

**Figure S9.** Atom-atom radial distribution functions  $g(r)$  in systems containing HFO1336mzzE (5%) and levuline at 298 K and 1.4 bar, for the following pairs: (a) HAF (HFO-1336mzzE) – Cl (anion), (b) FAA (HFO-1336mzzE) – HO1 (cation), (c) HAF (HFO-1336mzzE) – OHF (HBD), (d) FAA (HFO-1336mzzE) – HOF (HBD), (e) HAF (HFO-1336mzzE) – OF (HBD), (f) FAA (HFO-1336mzzE) – HJ1 (HBD).

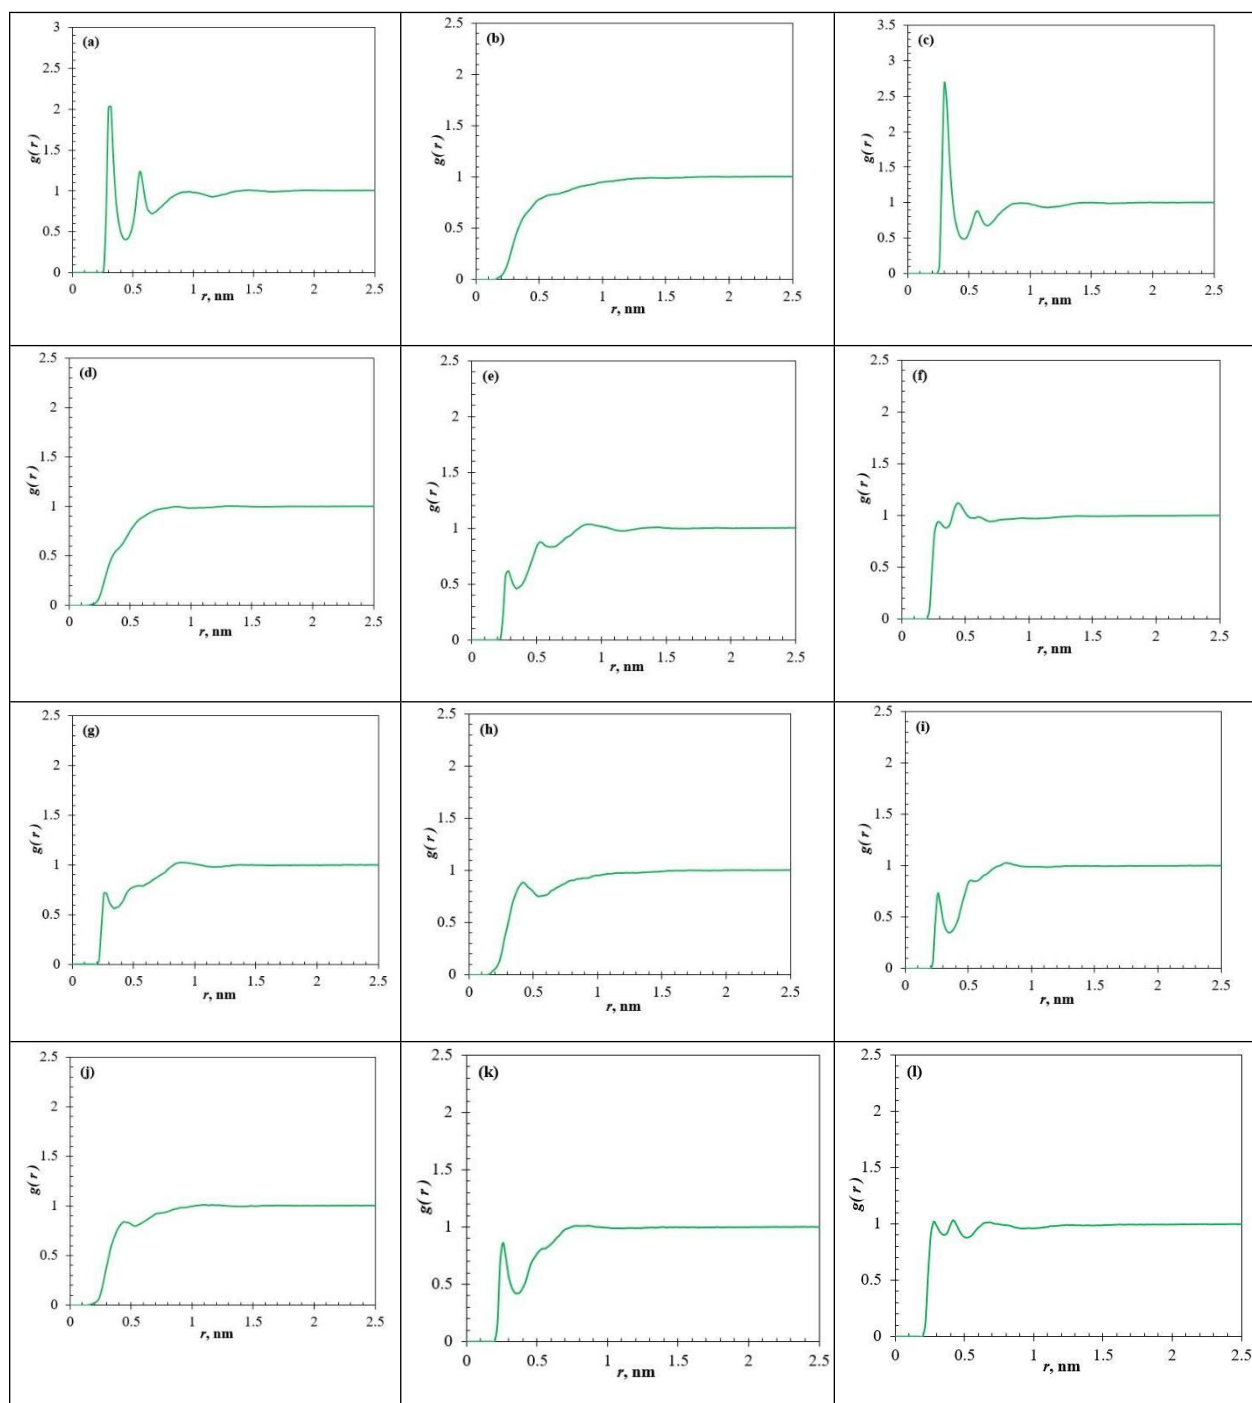

**Figure S10.** Atom-atom radial distribution functions  $g(r)$  in systems containing R1234zeE (20%) and levuline at 298 K and 3.7 bar, for the following pairs: (a) HAE (R1234zeE) – Cl (anion), (b) FAA (R1234zeE) – HO1 (cation), (c) HAD (R1234zeE) – Cl (anion), (d) FAA (R1234zeE) – HOF (HBD), (e) HAE (R1234zeE) – OHF (HBD), (f) FAA (R1234zeE) – HJ1 (HBD), (g) HAD (R1234zeE) – OHF (HBD), (h) FAC (R1234zeE) – HO1 (cation), (i) HAE (R1234zeE) – OF (HBD), (j) FAC (R1234zeE) – HOF (HBD), (k) HAD (R1234zeE) – OF (HBD), (l) FAC (R1234zeE) – HJ1 (HBD).

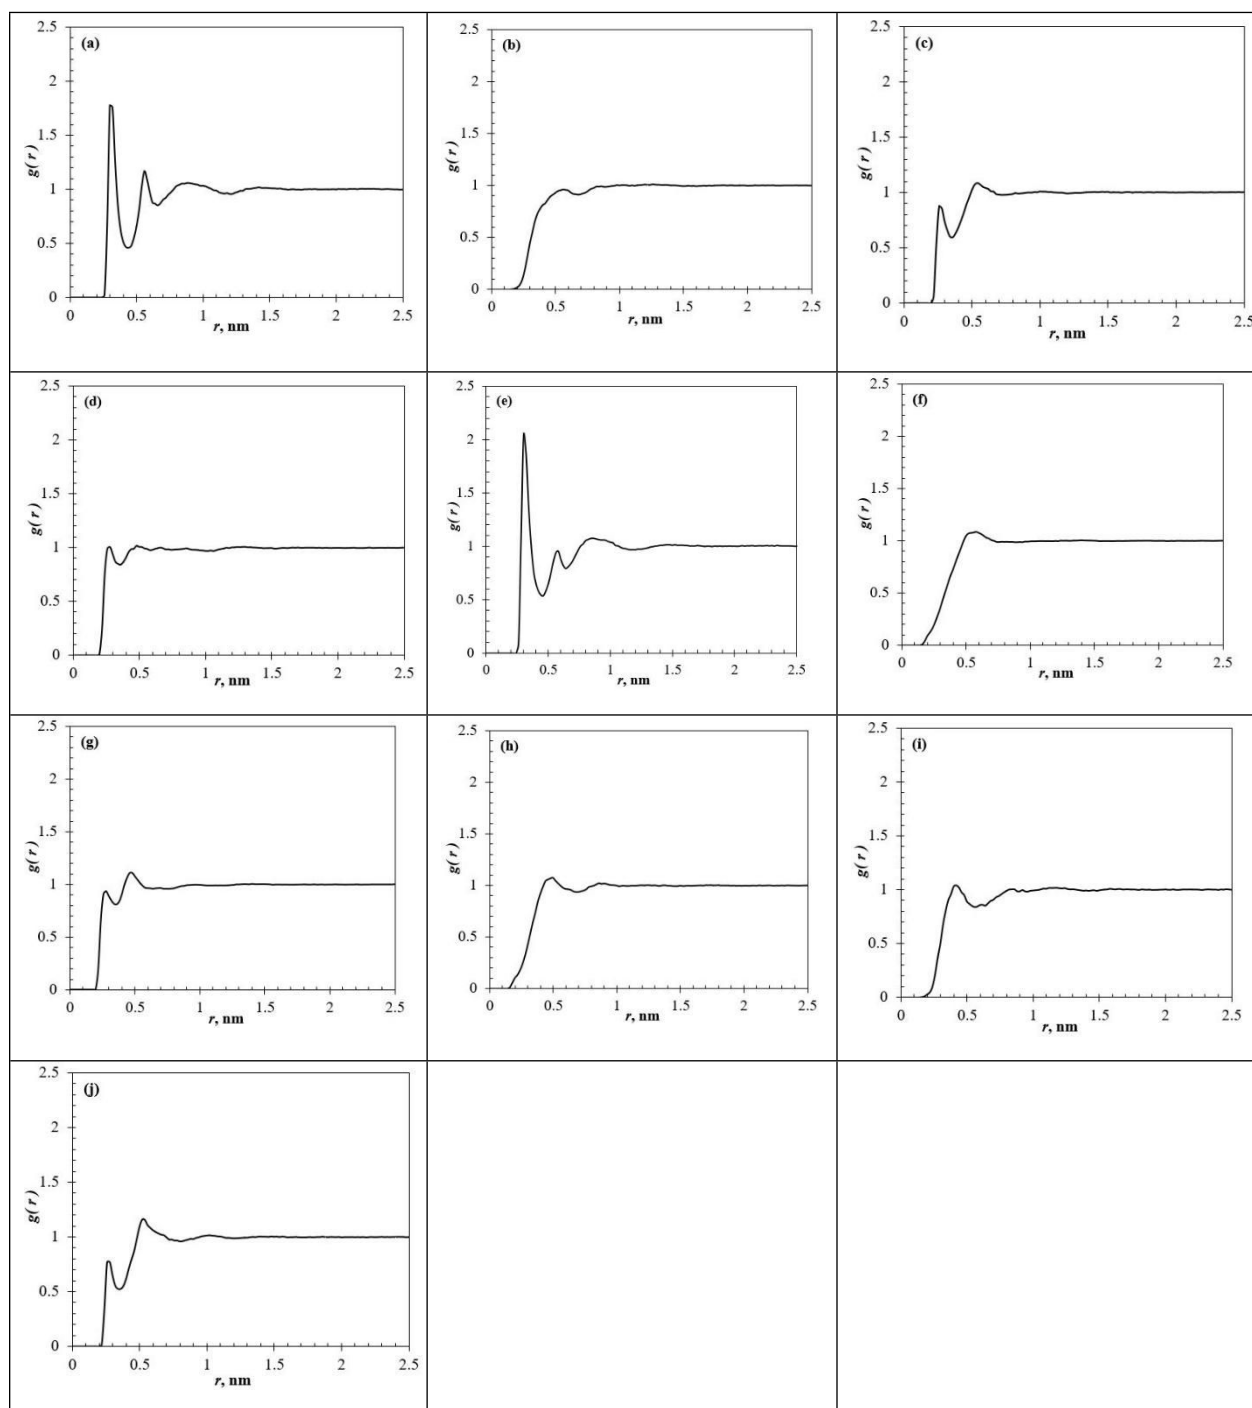

**Figure S11.** Atom-atom radial distribution functions  $g(r)$  in systems containing R1234zeE (5%) and ethaline at 298 K and 3.7 bar, for the following pairs: (a) HAE (R1234zeE) – Cl (anion), (b) FAA (R1234zeE) – HO1 (cation), (c) HAD (R1234zeE) – OAA (HBD), (d) FAC (R1234zeE) – HAC (HBD), (e) HAD (R1234zeE) – Cl (anion), (f) FAA (R1234zeE) – HAA (HBD), (g) FAA (R1234zeE) – HAC (HBD), (h) FAC (R1234zeE) – HAA (HBD), (i) FAC (R1234zeE) – HO1 (cation), (j) HAE (R1234zeE) – OAA (HBD).

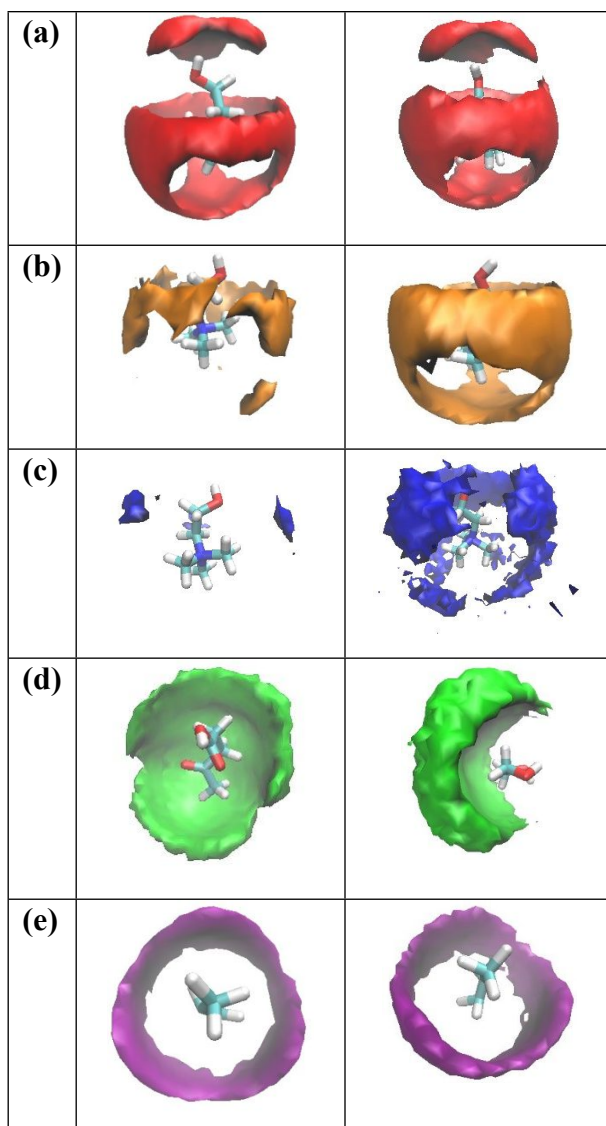

**Figure S12.** Spatial distribution functions (SDFs) at  $T_5 = 298$  K of the following refrigerant-DES mixtures: (left column) R1234zeE-levuline,  $x_R = 20\%$ ,  $P_5 = 3.7$  bar and (right column) R1234zeE-ethaline,  $x_R = 5\%$ ,  $P_5 = 3.7$  bar. SDFs for the following pairs are presented: (a) cation-anion, (b) cation-HBD, (c) cation-refrigerant, (d) HBD-refrigerant, (e) refrigerant-anion.

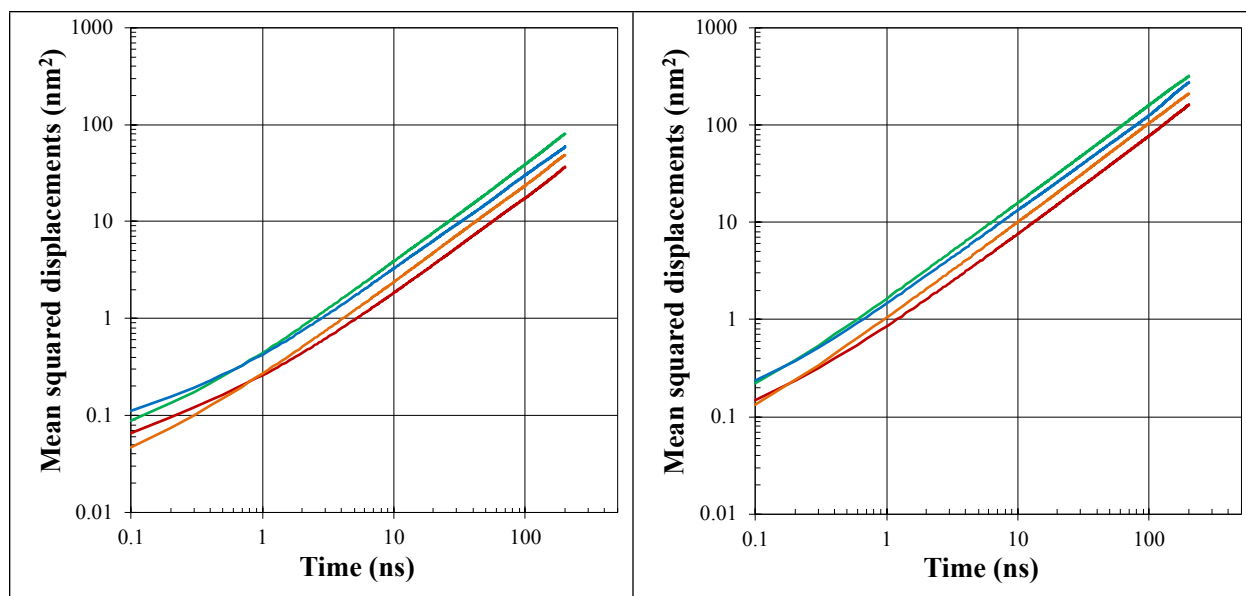

**Figure S13.** Mean squared displacements as a function of time in systems of R245fa in ethaline, at  $T_5 = 298$  K and  $P_5 = 1.0$  bar (left), and at  $T_8 = 343$  K and  $P_8 = 2.5$  bar (right). Red = choline (cation), orange = chlorine (anion), green = ethylene glycol (HBD), and blue = R245fa (refrigerant).
